# Supplementary material for: Facile synthesis of an α-Bi2O3/BiO2 heterojunction for enhanced piezoelectric catalytic degradation of dye wastewater
Source: Royal Society of Chemistry journal article supplement (doi:10.1039/d4nj02540g), 2024-01-01
Supplement: d4nj02540g1.pdf [file d4nj02540g1.pdf]

1 Support information

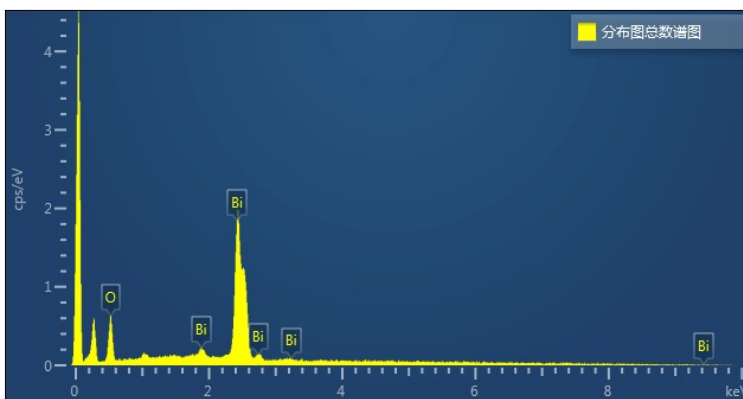

| element | Line type       | apparent concentration | <i>k</i> specific value | Wt%   | Wt% Sigma | Standard sample labels |
|---------|-----------------|------------------------|-------------------------|-------|-----------|------------------------|
| O       | K linear system | 0.10                   | 0.00035                 | 10.45 | 0.40      | SiO <sub>2</sub>       |
| Bi      | M linear system | 0.58                   | 0.00580                 | 89.55 | 0.40      | Bi                     |

2

Figure S1. The EDS element mappings of Bi<sub>2</sub>O<sub>3</sub>/BiO<sub>2</sub>-2

3

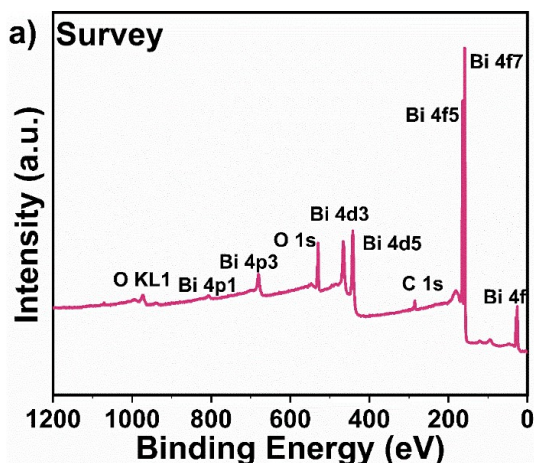

Figure S2. XPS spectra for Bi<sub>2</sub>O<sub>3</sub>/BiO<sub>2</sub>-2 of survey scan

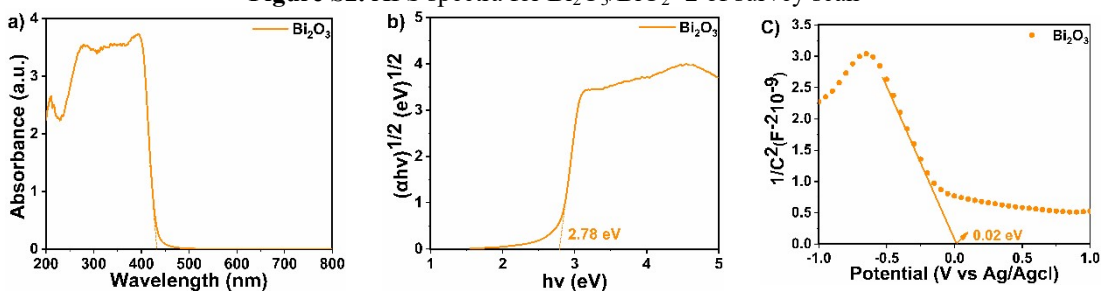

Figure S3. (a) UV-visible diffuse reflectance spectrum of Bi<sub>2</sub>O<sub>3</sub>, (b)  $(\alpha hv)^{1/2}$  vs.  $h\nu$  curves of Bi<sub>2</sub>O<sub>3</sub>, (c) Mott-Schottky plot of Bi<sub>2</sub>O<sub>3</sub>

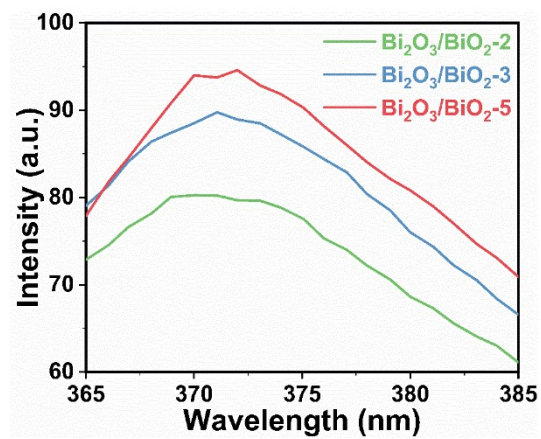

Figure S4. PL spectra of Bi<sub>2</sub>O<sub>3</sub>/BiO<sub>2</sub>

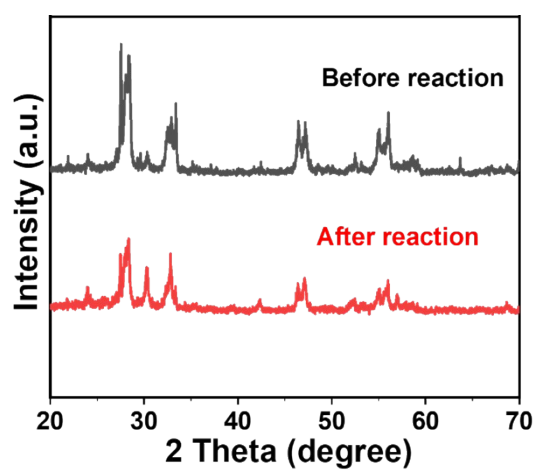

Figure S5. XRD pattern after reaction

1

2
